# Fission yeast *mfr1* activates APC and coordinates meiotic nuclear division with sporulation

Miguel A. Blanco\*, Laetitia Pelloquin\* and Sergio Moreno<sup>‡</sup>

Instituto de Microbiología Bioquímica, CSIC/Universidad de Salamanca, Edificio Departamental, Campus Miguel de Unamuno, 37007 Salamanca, Spain

\*These two authors contributed equally to this work

<sup>‡</sup>Author for correspondence (e-mail: smo@gugu.usal.es)

Accepted 10 March 2001

Journal of Cell Science 114, 2135-2143 (2001) © The Company of Biologists Ltd

## SUMMARY

Meiosis is the developmental program by which sexually reproducing diploid organisms generate haploid gametes. In yeast, meiosis is followed by spore morphogenesis. These two events are normally coordinated in such a way that spore formation is dependent upon completion of the meiotic nuclear divisions. Here we describe a meiosis-specific protein, *mfr1*, that is involved in this coordination. *mfr1* is an activator of the anaphase-promoting complex (APC), which is necessary for the rapid degradation of the *cdc13* cyclin at the end of meiosis II, prior to the formation of spores. An *mfr1* null mutant completes meiosis II but

remains with high levels of *cdc13* and *cdc2* kinase activity and has considerably delayed spore formation. By analogy with the mitotic cell cycle, where proteolysis and inactivation of *cdc2* kinase are necessary to trigger mitotic exit and cytokinesis, we propose that at the end of meiosis rapid and timely proteolysis of cyclins is required to switch on the differentiation program that eventually leads to the formation of haploid gametes.

Key words: Cell cycle, Meiosis, APC, Proteolysis, Fizzy, *mfr1*, Yeast

## INTRODUCTION

Progression through mitosis is controlled by cyclin-dependent kinases (cdk), which drive cells into metaphase, and by the anaphase-promoting complex (APC), a ubiquitin ligase that triggers sister chromatid separation, mitotic exit and cytokinesis (Cerutti and Simanis, 2000; Zachariae and Nasmyth, 1999). In a normal cell cycle, destruction of securins (*cut2* in *S. pombe*, *Pds1* in *S. cerevisiae*) is required for sister chromatid separation and chromosome segregation, while destruction of mitotic cyclins and the consequent loss of cdk activity drives exit from mitosis and cytokinesis. Degradation of mitotic cyclins is also required in  $G_1$  for the assembly of pre-replicative complexes in the DNA and, in fission yeast, for  $G_1$  arrest in response to mating pheromones or nutrient starvation (Blanco et al., 2000; Kitamura et al., 1998; Stern and Nurse, 1998; Yamaguchi et al., 1997; Yamaguchi et al., 2000).

Two APC activators have been described in all organisms analyzed so far. These are proteins containing seven WD repeats that associate to and activate APC. In fission yeast, *slp1* (known as *Cdc20* in budding yeast, *Fizzy* in *Drosophila* and *p55<sup>cdc</sup>* in animal cells) initiates APC-dependent degradation of securin and mitotic cyclins during the metaphase-to-anaphase transition. A second APC activator, *ste9/srw1* (or *Hct1/Cdh1* in *S. cerevisiae*, *Fizzy-related* in *Drosophila* or *Hct1/Cdh1* in animal cells), binds to APC and continues with the degradation of cyclins up to the end of  $G_1$ . *ste9/srw1* (or *Hct1/Cdh1*) binding to APC is negatively regulated by cdk phosphorylation (Blanco et al., 2000; Jaspersen et al., 1999; Kramer et al., 2000; Yamaguchi et al., 2000; Zachariae et al., 1998). In S-phase and  $G_2$ , when *cdc2* is active, *ste9/srw1* is phosphorylated and does

not associate with APC. At the end of mitosis, *ste9/srw1* is dephosphorylated, binds to APC, and promotes the degradation of mitotic cyclins in  $G_1$ . This ordered activation of APC by *slp1* in metaphase/anaphase and by *ste9/srw1* in anaphase/ $G_1$  is essential for mitotic exit, cytokinesis, and for  $G_1$  arrest (Blanco et al., 2000; Kim et al., 1998; Kitamura et al., 1998; Yamaguchi et al., 1997; Yamaguchi et al., 2000).

Little is known about the regulation of APC in meiosis. Meiosis is a specialized cell division with two major differences relative to the mitotic cell cycle. First, following premeiotic DNA synthesis, recombination takes place between homologous chromosomes in meiotic prophase. Second, after recombination two consecutive nuclear divisions occur without an intervening S-phase. In the first division (reductional division or meiosis I), homologous chromosomes are separated. In the second (equational division or meiosis II), sister chromatids segregate (Roeder, 1997). Once the two nuclear divisions have been completed, a differentiation program is induced to generate haploid germ cells. In yeast, the four haploid nuclei formed are packaged into spores.

Here, we describe a third activator of APC (*mfr1* for meiotic fizzy-related 1), which is specific for meiosis in fission yeast. *APC<sup>mfr1</sup>* is involved in the rapid and timely degradation of the *cdc13* M-phase cyclin at the end of meiosis II, which is necessary to inactivate the *cdc2* kinase and thereby to bring about sporulation.

## MATERIALS AND METHODS

### Fission yeast strains and methods

The fission yeast strains used in this study are listed in Table 1. Growth

**Table 1. *Schizosaccharomyces pombe* strains**

| Strain | Genotype                                                                                                                                                                                                                                     | Source     |
|--------|----------------------------------------------------------------------------------------------------------------------------------------------------------------------------------------------------------------------------------------------|------------|
| Sp448  | <i>h<sup>-</sup> pat1-114 leu1-32</i>                                                                                                                                                                                                        | P. Nurse   |
| Sp785  | <i>h<sup>+</sup>/h<sup>-</sup> ade6-M210/ade6-M216 leu1-32/leu1-32</i>                                                                                                                                                                       | This study |
| Sp813  | <i>h<sup>+</sup> lid1::lid1-myc:kanMX</i>                                                                                                                                                                                                    | K. Gould   |
| Sp963  | <i>h<sup>+</sup>/h<sup>-</sup> mfr1Δ::ura4<sup>+</sup>/mfr1Δ::ura4<sup>+</sup> ade6-M210/ade6-M216 leu1-32/leu1-32 ura4-d18/ura4-d18</i>                                                                                                     | This study |
| Sp964  | <i>h<sup>-</sup>/h<sup>-</sup> pat1-114/pat1-114 ade6-M210/ade6-M216 leu1-32/leu1-32</i>                                                                                                                                                     | This study |
| Sp965  | <i>h<sup>-</sup>/h<sup>-</sup> pat1-114/pat1-114 mrf1Δ::ura4<sup>+</sup>/mfr1Δ::ura4<sup>+</sup> ade6-M210/ade6-M216 leu1-32/leu1-32 ura4-d18/ura4-d18</i>                                                                                   | This study |
| Sp966  | <i>h<sup>-</sup>/h<sup>-</sup> pat1-114/pat1-114 mfr1Δ::ura4<sup>+</sup>/mfr1Δ::ura4<sup>+</sup> ade6-M210/ade6-M216 leu1-32/leu1-32 ura4-d18/ura4-d18</i><br><i>pJK148mfr1-HA/pJK148mfr1-HA</i>                                             | This study |
| Sp967  | <i>h<sup>-</sup>/h<sup>-</sup> pat1-114/pat1-114 mfr1Δ::ura4<sup>+</sup>/mfr1Δ::ura4<sup>+</sup> ade6-M210/ade6-M216 leu1-32/leu1-32 ura4-d18/ura4-d18</i><br><i>pJK148mfr1-HA/pJK148 mfr1-HA lid1::lid1-myc:kanMX/ lid1::lid1-myc:kanMX</i> | This study |
| Sp969  | <i>h<sup>-</sup>/h<sup>-</sup> pat1-114/pat1-114 ade6-M210/ade6-M216 leu1-32/leu1-32 pJK148cdc13<sup>+</sup></i>                                                                                                                             | This study |
| Sp970  | <i>h<sup>-</sup>/h<sup>-</sup> pat1-114/pat1-114 ade6-M210/ade6-M216 leu1-32/leu1-32 pJK148cdc13-des2</i>                                                                                                                                    | This study |

conditions and strain manipulations were as described previously (Moreno et al., 1991). Diploids strains were generated by mating in MEA plates or by protoplast fusion (Sipiczki and Ferenczy, 1977), and the identity of these strains was confirmed by Southern blotting. Yeast transformation was carried out using the lithium acetate transformation protocol (Norbury and Moreno, 1997). Experiments in liquid culture were carried out in minimal medium (EMM) containing the required supplements, starting with a cell density of  $2-4 \times 10^6$  cells/ml, corresponding to mid-exponential phase growth. For sporulation in liquid culture, cells were incubated in EMM + supplements, and shifted to EMM-NH<sub>4</sub>Cl + supplements, a nitrogen-free version of minimal medium.

Synchronous meiosis in *pat1-114/pat1-114* temperature-sensitive mutants was performed as follows. *h<sup>-</sup>/h<sup>-</sup> pat1-114/pat1-114* diploid cells were cultured in rich YES medium at 25°C for one day and transferred to EMM + supplements (100 μg/ml) for another day. These cells were then washed and transferred to EMM-NH<sub>4</sub>Cl + supplements (50 μg/ml) at a density of  $2-3 \times 10^6$  cells/ml. After 14 hours at 25°C, most cells were arrested in G<sub>1</sub>. The culture was then shifted to 34°C, in the presence of 0.5 g/l NH<sub>4</sub>Cl and 50 μg/ml supplements, to induce meiosis.

### Cloning of *mfr1<sup>+</sup>*

The *mfr1<sup>+</sup>* sequence was identified by searching the fission yeast database deposited at the Sanger Centre (UK) ([http://www.sanger.ac.uk/Projects/S\\_pombe/](http://www.sanger.ac.uk/Projects/S_pombe/)) for homologues of *ste9* using the BLAST 2.0 (Basic Local Alignment Search Tool) algorithm. To isolate a DNA fragment containing the *mfr1<sup>+</sup>* gene, an *S. pombe* genomic library containing partially digested Sau3A DNA fragments constructed in pUR18 plasmid was screened by colony hybridization using a *mfr1<sup>+</sup>* ORF probe generated by PCR. A 3.8 kb genomic fragment containing the 1.3 kb *mfr1<sup>+</sup>* open reading frame flanked by 1.9 kb in the 5' untranslated region and 0.6 kb in the 3' untranslated region was cloned into pTZ18R (pTZ18R *mfr1<sup>+</sup>*-genomic) and sequenced.

### Disruption of *mfr1<sup>+</sup>*

The *mfr1* null allele was generated by a PCR-based approach as described previously (Bahler et al., 1998). The *S. pombe ura4<sup>+</sup>* gene was amplified by PCR using the KS-*ura4<sup>+</sup>* plasmid as template and the primers 5'-ATTTATTCACGAAATAGGAATCTCAACATTTCCCTTCCATCCCGACTGAACCTCAACTTATAAAGAATTG-GTTGACACGCCAGGTTTTCCCGACACGAC-3' and 5'-ATC-ACCTGATAATCCTGGAACGAATGCTGAAGAGGATGAAGATGATGATGGGGTTGAGATGATTGATGTTGTTTGAAGCGGATA-A-CAATTTACACAGGA-3' (5'-ends are targeting sequences corresponding to 76 nucleotides immediately upstream and downstream from the *mfr1<sup>+</sup>* ORF and 3'-ends are 24 underlined nucleotides corresponding to sequences on either side of pBluescript multiple cloning site). *S. pombe ura4-d18* diploid cells were transformed with this 2.2 kb PCR-amplified fragment, and the *ura4<sup>+</sup>* transformants were checked for the correct integration of the DNA

fragment in the *mfr1<sup>+</sup>* locus by Southern blot analysis. A heterozygous diploid was sporulated and the spores germinated in rich medium. After tetrad dissection the four spores were able to grow. Haploid *ura4<sup>+</sup>* cells deleted for *mfr1* were viable.

### HA-tagging of *mfr1<sup>+</sup>*

The plasmid pTZ18R *mfr1<sup>+</sup>* containing the 3.8 kb genomic fragment was used to introduce a *NotI* restriction site just before the *mfr1<sup>+</sup>* stop codon by site-directed mutagenesis using the Muta-gene phagemid in vitro mutagenesis kit (BioRad) and the oligonucleotide 5'-AGTAC-ATTAATTCGCGGCCGCTAATCAAACAACATC-3' (the *NotI* site is underlined). A 110 pb fragment containing three HA-epitope repeats was then cloned in frame in the *NotI* site. The construction was confirmed by DNA sequencing. A genomic fragment containing *mfr1-3xHA* was then subcloned into the integrative pJK148 plasmid containing the *leu1<sup>+</sup>* marker and used to transform the haploid strains *h<sup>-</sup> pat1-114 mfr1::ura4<sup>+</sup> ade6-M210 leu1-32* and *h<sup>-</sup> pat1-114 mfr1::ura4<sup>+</sup> ade6-M216 leu1-32*. Stable single-copy integrants were obtained and checked by Southern blot and a diploid strain was prepared by protoplast fusion. This diploid strain essentially behaved like a wild-type *h<sup>-</sup>/h<sup>-</sup> pat1-114/pat1-114 mfr1<sup>+</sup>/mfr1<sup>+</sup>* (Fig. 2).

### Protein extracts, western blots and kinase assays

Total protein extracts were prepared as described previously (Blanco et al., 2000). For western blot analysis, 50-75 μg of total protein extract was run on a 14% SDS-PAGE gel (30:0.15 acrylamide:bisacrylamide ratio), transferred to nitrocellulose, and probed with SP4 anti-cdc13 (1:400), anti-cig1 (1:250) affinity-purified polyclonal antibodies, or with anti-myc 9E10 (1:1000) or anti-HA 12CA5 (0.15 μg/ml) monoclonal antibodies. Goat anti-rabbit or goat anti-mouse antibodies conjugated to horseradish peroxidase (Amersham) (1:3,500) were used as secondary antibodies. As loading controls, rabbit affinity-purified anti-cdc2 C2 antibodies (1:250) were used. Immunoblots were developed using the ECL kit (Amersham) or Super Signal (Pierce). Immunoprecipitations with cdc2 antibodies and cdc2 protein kinase assays were performed as described previously (Benito et al., 1998).

### Coimmunoprecipitation analysis of *mfr1* and *lid1-myc*

Total protein extracts were prepared from  $3 \times 10^8$  cells using HB buffer (Moreno et al., 1989; Moreno et al., 1991). Cell extracts were spun at 4°C in a microfuge for 15 minutes, and protein concentrations were determined using the BCA protein assay kit (Pierce). Approximately 3.5 mg of total protein extracts were subjected to immunoprecipitation by consecutive incubation with the monoclonal anti-HA 12CA5 (1 μg) or anti-myc 9E10 (1 μg) antibody for 1 hour on ice, and protein A-Sepharose or protein G-Sepharose (Pharmacia-Biotech) for 30 minutes at 4°C with agitation. Immunoprecipitates were washed six times with 1 ml of HB buffer. Lysates and immunoprecipitates were resolved on 12% SDS-polyacrylamide gels, followed by western blot analysis as above.

**Flow cytometry and microscopy**

About 10<sup>7</sup> cells were spun down, washed once with water, fixed in 70% ethanol and processed for flow cytometry or DAPI staining, as described previously (Moreno et al., 1991; Sazer and Sherwood, 1990). A Becton-Dickinson FACScan was used for flow cytometry. To estimate the proportion of cells in meiosis I, meiosis II or in sporulation, we determined the percentage of cells with one, two or four nuclei after DAPI staining and the percentage of asci with mature spores under phase contrast microscopy.

For mfr1 subcellular localization, indirect immunofluorescence was performed as previously described (Sohrmann et al., 1996) except that the cells were fixed in 4% *p*-formaldehyde (Sigma) in PEM and digested for 5 minutes in 1 mg/ml zymolyase 20T. Monoclonal anti-HA (1:200) or polyclonal anti-sad1 (1:25) antibodies and anti-mouse Cy3-conjugated (Jackson) or anti-rabbit FITC-conjugated (Kappel) secondary antibodies (1:500) were used to detect mfr1-HA and sad1, respectively. Lid1(APC4)-myc localization was done using rabbit polyclonal antibodies (Upstate Biotechnology) against the myc epitope (1:50).

**RNA preparation and northern blots**

RNA from cells was prepared by lysis with glass beads in the presence of phenol (Moreno et al., 1991). RNA gels were run in the presence of formaldehyde, transferred to GeneScreen Plus (NEN, Dupont) and probed with the *mfr1*<sup>+</sup> open reading frame according to the manufacturer's instructions.

**RESULTS**

**mfr1 is a meiosis-specific protein**

In order to identify additional proteins related to the APC activator *ste9*/*srw1* we searched the *S. pombe* genome sequence database at the Sanger Centre (UK) using the BLAST 2.0 algorithm. A new open reading frame (SPBC660.02) was identified encoding a protein that showed 40% identity to *ste9*/*srw1*. This protein was more similar to the *Fizzy*-related family than to the *Fizzy*-family of APC activators (Fig. 1).

This gene was not expressed during the mitotic cell cycle and was dramatically induced during meiosis (Fig. 2A). We

therefore named this gene *mfr1*<sup>+</sup> (for meiotic fizzy-related 1). To study the expression of *mfr1*<sup>+</sup>, we constructed the diploid strain (Sp966) *h*<sup>-</sup>/*h*<sup>-</sup> *pat1-114/pat1-114 mfr1-3xHA/mfr1-3xHA*. These cells are temperature sensitive for the *pat1*<sup>+</sup> gene and contain a functional version of *mfr1* tagged at the C terminus with three copies of the influenza virus hemagglutinin (HA) epitope. Exponentially growing cells (Fig. 2, Exp) were pre-synchronized in G<sub>1</sub> by nitrogen starvation at 25°C for 14 hours (Fig. 2, 0 hours). Nitrogen was added back and the

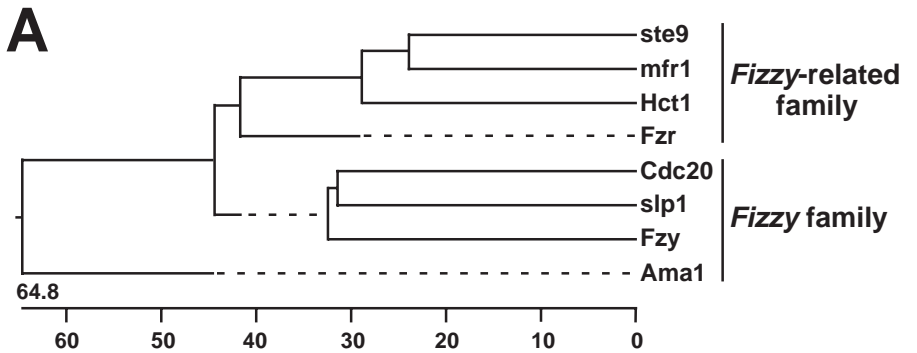

**B**

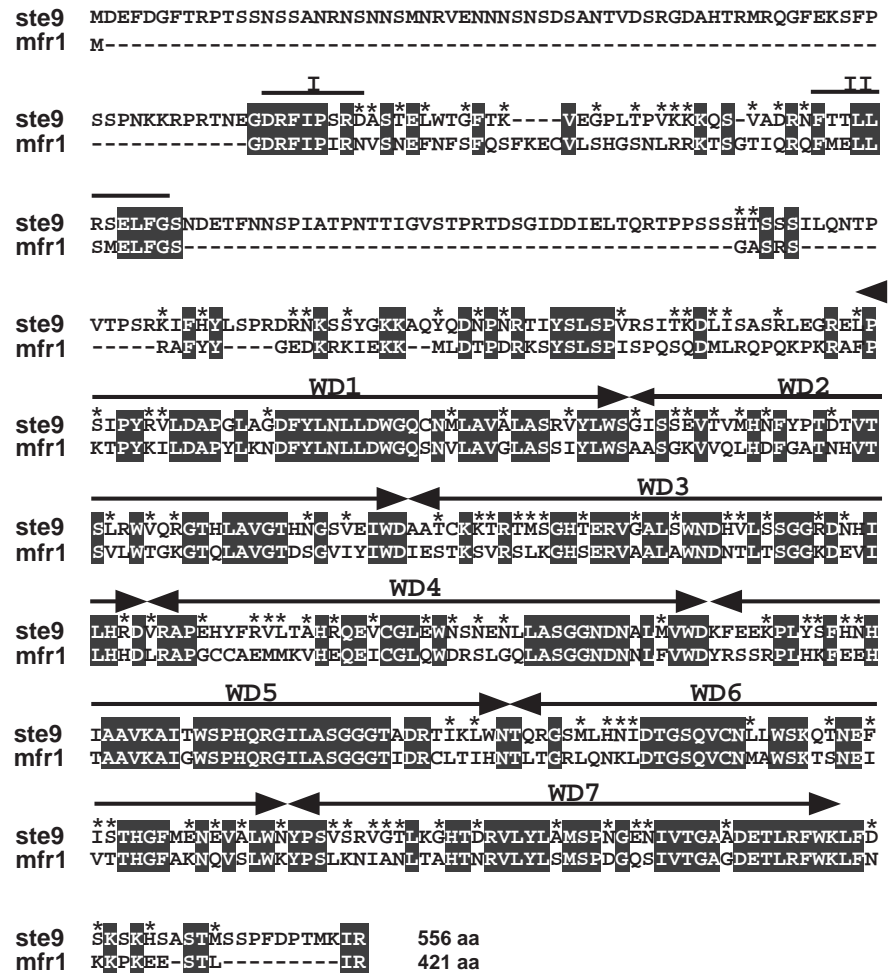

**Fig. 1.** Fission yeast *mfr1* is related to *ste9*/*srw1*. (A) *mfr1* belongs to the *Fizzy*-related family of APC activators. Phylogenetic tree using the clustal method with PAM250 residue weight table. (B) Protein sequence comparison between *ste9* and *mfr1*. Black boxes indicate identity; asterisks indicate related amino acids. The homology between *ste9* and *mfr1* extends beyond the seven WD repeats, including domains I and II previously described (Cebolla et al., 1999).

**Fig. 2.** *mfr1*<sup>+</sup> is expressed exclusively during meiosis. Cells of the diploid strain Sp966 were presynchronized in G<sub>1</sub> by nitrogen starvation for 14 hours at 25°C. Nitrogen was added and the culture was incubated at 34°C to inactivate the *pat1-114* temperature-sensitive protein kinase. (A) Northern and western blots showing *mfr1*<sup>+</sup> mRNA and protein levels. Cdc13 and *cdc2* protein levels are shown. Exp, mitotic exponentially growing cells before nitrogen starvation. (B) FACS analysis. Pre-meiotic S-phase occurred between 2 and 3 hours. Cells with 1C DNA content observed after 6.5 hours correspond to haploid spores that are released when cells are sonicated before flow cytometry. (C) Percentage of cells with 1, 2 and 4 nuclei and percentage of asci. Meiosis I occurred between 4 and 5 hours, meiosis II between 5 and 6 hours and sporulation after 7.5 hours.

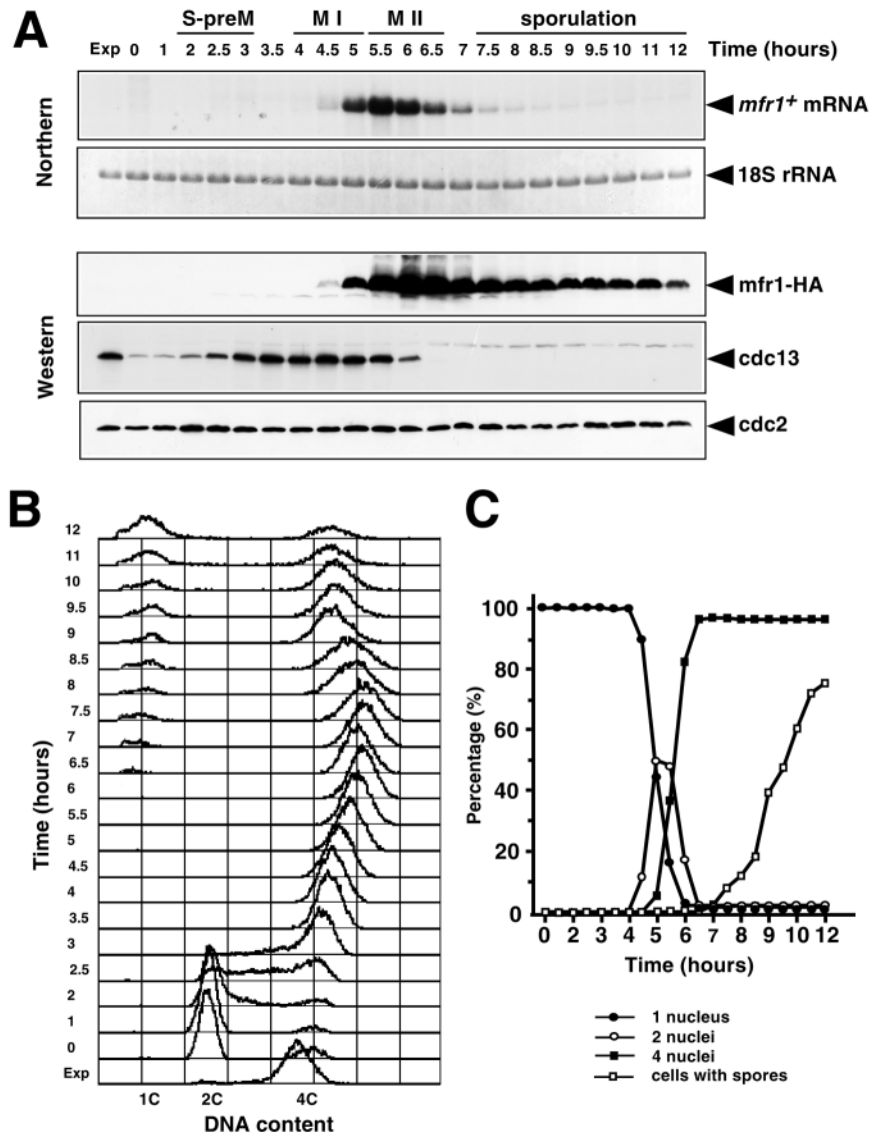

cultures were incubated at 34°C to inactivate the *pat1* kinase (Bahler et al., 1991). Under these conditions, the cells underwent synchronous meiosis (Fig. 2B,C); *mfr1*<sup>+</sup> mRNA was expressed during meiosis I, peaking at meiosis II (Fig. 2A). *mfr1* protein levels followed those of the mRNA and remained high throughout the second meiotic nuclear division and sporulation (Fig. 2A). The *mfr1*<sup>+</sup> gene contains an intron with a stop codon. This intron seems to be spliced immediately after transcription since we failed to observe any significant delay between the expression of the gene and the synthesis of the protein (Fig. 2A). This experiment indicates that *mfr1*<sup>+</sup> mRNA and protein are meiosis-specific.

### The *mfr1* mutant is defective in spore formation

To investigate the function of *mfr1*, a deletion of *mfr1*<sup>+</sup> was constructed by one-step gene replacement. The complete open reading frame of *mfr1*<sup>+</sup> was replaced with the *ura4*<sup>+</sup> marker and transformed into a diploid *ura4-d18* diploid strain. Stable *ura4*<sup>+</sup> transformants were selected and successful disruptants were identified by Southern blot analysis. Diploid cells, in which one copy of *mfr1*<sup>+</sup> was deleted, were sporulated and tetrads were dissected. All tetrads gave rise to four colonies, of which two were *ura4*<sup>+</sup> and two were *ura4-d18*. Haploid *ura4*<sup>+</sup> cells, deleted for the *mfr1*<sup>+</sup> gene, showed no apparent growth defects and were able to mate with the same efficiency as wild-type cells (data not shown). We conclude that *mfr1* has no obvious function in the mitotic cell cycle, which is consistent with the fact that *mfr1*<sup>+</sup> is expressed only during meiosis.

In order to test whether *mfr1* has a function in meiosis, a homozygous *h*<sup>+</sup>/*h*<sup>-</sup> *mfr1*Δ/*mfr1*Δ diploid strain was constructed. These cells were able to complete both meiotic nuclear divisions but showed severe defects in spore formation (Fig. 3A). Sporulation was delayed considerably with respect to wild-type cells. After 24 hours in sporulation medium, no asci with spores in the *mfr1*Δ/*mfr1*Δ mutant were observed,

while in the wild-type isogenic strain a high percentage of the asci contained four spores. After 48 hours, 80% of the *mfr1*Δ/*mfr1*Δ mutant cells contained spores, of which only 3% were four-spore asci (Fig. 3B). In order to test whether the spores formed were viable or not, 200 randomly chosen spores from the wild type and 200 spores from the *mfr1*Δ/*mfr1*Δ strain were micromanipulated in rich medium (YES) and spore viability was examined after 4 days at 32°C. Spore viability was similar in the wild type and the *mfr1* mutant (68% versus 71%, respectively). All spores from the *mfr1*Δ/*mfr1*Δ strain gave rise to haploid colonies, confirming that chromosome segregation during meiosis is normal.

For close examination of this phenotype, an *h*<sup>-</sup>/*h*<sup>-</sup> *pat1-114*/*pat1-114* *mfr1*Δ/*mfr1*Δ diploid strain was constructed and compared with *h*<sup>-</sup>/*h*<sup>-</sup> *pat1-114*/*pat1-114* control cells in a synchronous meiosis experiment (Fig. 4). In both cases, cells underwent premeiotic DNA replication between 2 and 3 hours, meiosis I between 4 and 5 hours and meiosis II between 5 and 6 hours (Fig. 4A,B). Whereas after 8 hours, 80% of the control cells had undergone sporulation, not even one ascus was observed after 10 hours in the *mfr1*Δ/*mfr1*Δ mutant, confirming

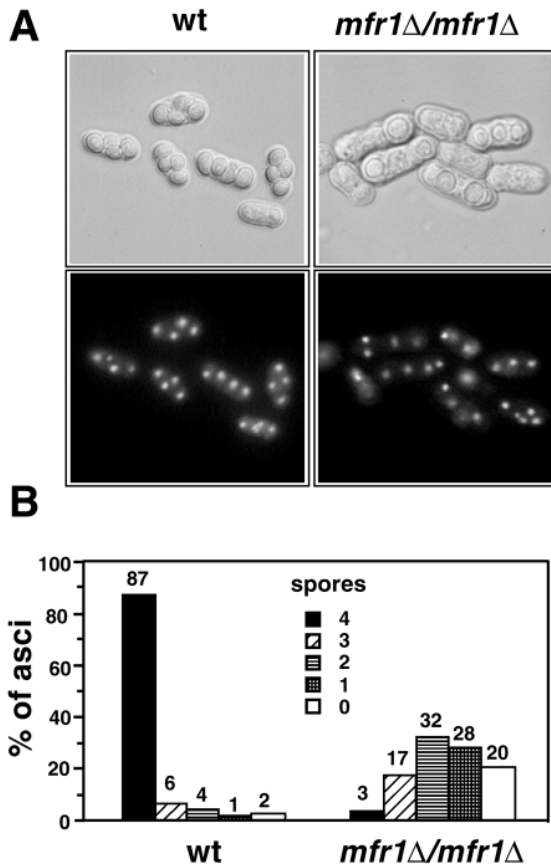

**Fig. 3.** *mfr1*<sup>+</sup> is required for sporulation. A wild-type diploid (Sp785) and a *mfr1Δ/mfr1Δ* mutant (Sp963) were sporulated on agar plates containing malt extract (sporulation medium). (A) Photographs of cells after 48 hours using interference microscopy (top) and DAPI staining (bottom). In the *mfr1Δ/mfr1Δ* mutant most cells contained four nuclei, as in the wild type. These nuclei were difficult to photograph because they were on different focal planes. (B) Percentage of asci after 48 hours with 4, 3, 2, 1 and 0 spores.

that sporulation is severely impaired (Fig. 4A,B). These experiments clearly show that *mfr1* is required at the end of the meiotic nuclear divisions for spore formation. Tubulin staining with the TAT-1 antibodies of the *mfr1Δ/mfr1Δ* mutant cells after 5, 6 and 7 hours revealed that the meiotic spindles disassemble (data not shown), indicating that these cells complete meiosis II.

In meiosis II, at the metaphase to anaphase transition, the cytoplasmic face of the spindle-pole bodies (SPB) differentiate into multilayered plaques (Hirata and Shimoda, 1994; Tanaka and Hirata, 1982). During anaphase, the inner side of the SPB forms the meiotic spindle while the outer side of the plaques serves as platform for the assembly of the forespore membrane (Hirata and Shimoda, 1994; Tanaka and Hirata, 1982). The forespore membrane grows by vesicle fusion and eventually encapsulates each of the four haploid nuclei. Finally, spore walls are synthesized by accumulating wall materials between the inner and outer membranes of the forespore (Hirata and Shimoda, 1994; Tanaka and Hirata, 1982). This morphological alteration of the SPB

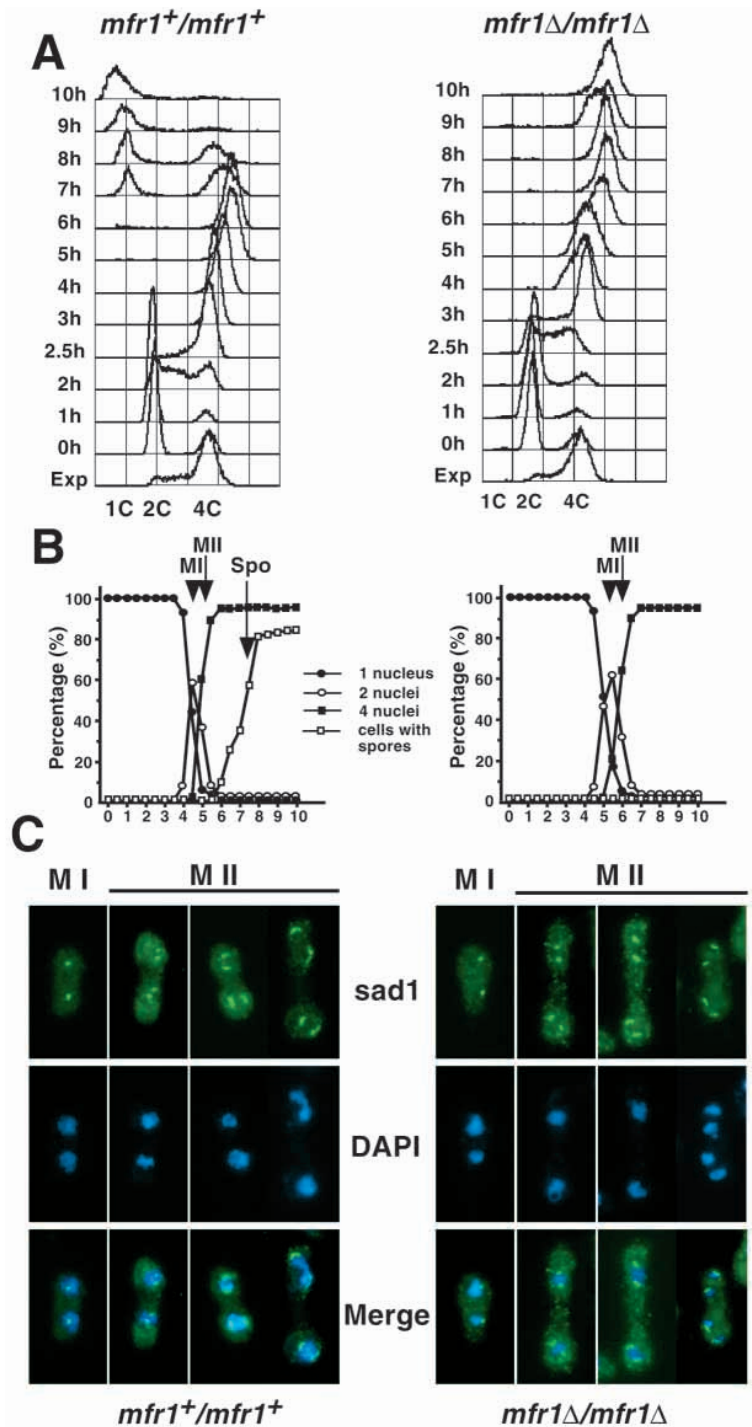

**Fig. 4.** The *mfr1Δ/mfr1Δ* mutant completes meiosis II but fails to undergo sporulation. The strains *h<sup>-</sup>/h<sup>-</sup> pat1-114/pat1-114* (Sp964) and *h<sup>-</sup>/h<sup>-</sup> pat1-114/pat1-114 mfr1Δ/mfr1Δ* (Sp965) were synchronized through meiosis as indicated in Fig. 2. (A) FACS analysis. Pre-meiotic S-phase took place between 2 and 3 hours in both cases. Haploid spores (as cells with 1C DNA content) were observed in the control cells after 7 hours but not in the *mfr1Δ/mfr1Δ* mutant. Exp, exponentially growing cells before nitrogen starvation. (B) Percentage of cells with 1, 2 and 4 nuclei and of asci with spores during the experiment. Spores were not observed in the *mfr1Δ/mfr1Δ* strain during this experiment. (C) Spindle-pole body (SPB) staining with anti-*sad1* antibodies and DAPI staining in cells undergoing meiosis I (MI) and meiosis II (MII). The two cells shown in the right panels in each case have modified SPBs.

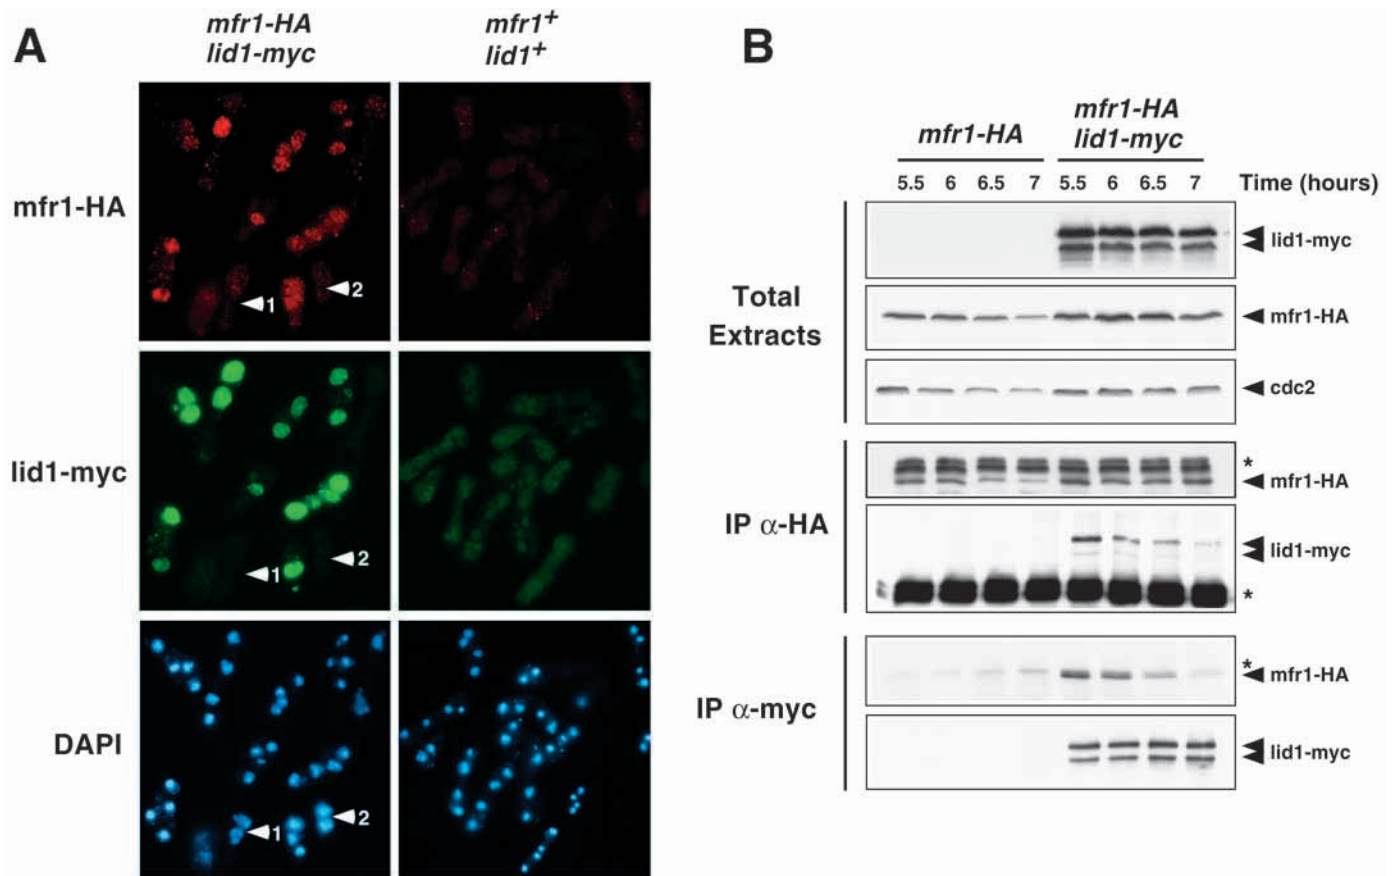

**Fig. 5.** *mfr1* colocalizes and interacts with APC during meiosis. (A) Cells of the diploid strain Sp967, containing *mfr1* tagged with three copies of the HA epitope and *lid1*(APC4) tagged with 9 copies of the myc epitope, were induced to undergo synchronous meiosis as indicated in Fig. 2. After 6 hours, cells were fixed and stained with anti-HA monoclonal antibodies, anti-myc polyclonal antibodies, and with DAPI. Nuclei 1 and 2 are in meiosis I. Cells in the right panels are control cells (Sp964) lacking the HA and the myc tags stained with anti-HA and anti-myc antibodies. (B) The diploid strains Sp967 and the control Sp966 with identical genotype except that it is wild type for *lid1<sup>+</sup>* were synchronized in meiosis. Samples were taken at 5.5, 6, 6.5 and 7 hours for immunoprecipitation with anti-HA or anti-myc antibodies. Immunoprecipitates were run on SDS-PAGE gels and probed with anti-HA or anti-myc antibodies. Western blots of total extracts were probed with anti-myc and anti-HA antibodies to check the levels of the tagged proteins. Western blot with anti-cdc2 is shown as loading control. \* IgG heavy chain.

produces a transient change in shape from a dot into a crescent when stained with anti-sad1 antibodies (Hagan and Yanagida, 1995). We carried out immunofluorescence in wild type and *mfr1Δ/mfr1Δ* mutant cells using anti-sad1 antibodies, observing that in the *mfr1Δ/mfr1Δ* mutant the SPB undergoes the normal transition from a dot to a crescent (Fig. 4C). This observation indicates that the defect in sporulation in the *mfr1* mutant is not due to a failure in SPB differentiation, as is the case in some fission yeast sporulation mutants (Ikemoto et al., 2000).

#### *mfr1* colocalizes and interacts with APC in meiosis

We next studied the localization of *mfr1* in cells undergoing meiosis. We used the diploid strain Sp967 (see Table 1) where both copies of *mfr1<sup>+</sup>* have been deleted and two copies of *mfr1-3xHA* were integrated in the *leu1* loci. In this strain, *mfr1-3xHA/mfr1-3xHA* fully complements the sporulation defect of the *mfr1Δ/mfr1Δ* mutant and essentially behaved like the wild type (Fig. 2). *mfr1* was not detected in cells during meiosis I (Fig. 5A, cells 1 and 2) but became detectable in anaphase II, accumulating in the area around the nucleus where the

forespore membrane was being formed (Fig. 5A). In most cells, *mfr1* was located around one, two, three and, very seldom, around the four nuclei simultaneously (Fig. 5A). Since *mfr1* could be a regulator of APC, we tested whether *mfr1* colocalizes with this complex. The strain Sp967 contains both chromosomal copies of the *lid1<sup>+</sup>* gene, encoding subunit 4 of APC (APC4), modified by addition of 9 copies of the myc epitope (Berry et al., 1999). Staining of APC4 with anti-myc antibodies showed a pattern similar to that of *mfr1* (Fig. 5A). APC4 colocalized with *mfr1* in 90% of the nuclei (Fig. 5A), suggesting that the majority of *mfr1* is associated with APC.

To confirm that *mfr1* interacts with APC in meiosis, we examined whether *mfr1* coprecipitates with APC. A *pat1-114* diploid strain containing *mfr1-3xHA* and *lid1*(APC4)-9xmyc (Sp967) and a control strain with identical genotype but with the wild-type *lid1<sup>+</sup>* gene (Sp966) were induced to undergo synchronous meiosis as described before. Samples were taken at different times (5.5, 6, 6.5 and 7 hours) for immunoprecipitation with anti-HA or anti-myc antibodies. As shown in Fig. 5B, *mfr1* was present in immunoprecipitates of *lid1*(APC4) and vice versa, indicating that *mfr1* not only

**Fig. 6.** Cdc13 cyclin is stabilized in the *mfr1Δ/mfr1Δ* mutant. (A) Strains *h<sup>-</sup>h<sup>-</sup> pat1-114/pat1-114* (Sp964) and *h<sup>-</sup>h<sup>-</sup> pat1-114/pat1-114 mfr1Δ/mfr1Δ* (Sp965) were synchronized through meiosis as indicated in Fig. 2. Samples were taken every 30 minutes and protein extracts were analyzed by western blot with antibodies to *cig1*, *cdc13* and *cdc2*. Exp, exponentially growing cells before nitrogen starvation. (B) Cdc2 protein kinase assays after immunoprecipitation with *cdc2* antibodies. Samples were taken every hour.

colocalizes with APC but also interacts with APC *in vivo* during meiosis.

### **mfr1 is necessary for the rapid and timely degradation of cdc13 cyclin**

During mitosis in fission yeast, active *cdc2*/cyclin kinase prevents cytokinesis before anaphase by inhibiting actomyosin ring constriction and septation. This control mechanism prevents the constricting ring and the septum from cutting the nuclei in half before sister chromatid segregation (Balasubramanian et al., 2000; Le Goff et al., 1999). At the end of anaphase, after sister chromatid segregation and spindle disassembly, the actomyosin ring constricts, the division septum is formed, and two daughter cells are generated. Therefore, downregulation of *cdc2*/cyclin in anaphase is essential for cytokinesis (Cerutti and Simanis, 1999; He et al., 1997; Kim et al., 1998).

By analogy with this control mechanism that prevents cytokinesis until *cdc2*/cyclin complexes have been inactivated, we reasoned that in meiosis the *cdc2*/cyclin kinase might prevent sporulation before the completion of meiosis II. If *mfr1* functions as a meiosis-specific activator of APC required for the degradation of cyclins, failure to destroy cyclins after meiosis II will keep the *cdc2*/cyclin complexes active and could inhibit sporulation. In order to test this hypothesis, we analyzed the protein levels of *cig1* and *cdc13* M-phase cyclins in wild-type and *mfr1Δ/mfr1Δ* cells (Fig. 6A). *cig1* and *cdc13* are B-type cyclins known to be destroyed during mitosis (Blanco et al., 2000; Moreno et al., 1989). In both wild-type and *mfr1Δ/mfr1Δ* cells, *cig1* protein levels rose during premeiotic DNA replication and disappeared as cells were undergoing meiosis I (Fig. 6A). *Cdc13* was rapidly destroyed in wild-type cells during meiosis II (Fig. 6A, see also Fig. 2A). In contrast, *cdc13* was significantly stabilized in the *mfr1Δ/mfr1Δ* mutant as compared to the wild type (Fig. 6A), suggesting that this cyclin may be one target of APC<sup>*mfr1*</sup>. Consistent with this, *cdc2* protein kinase activity and the mitotic spindle persisted for longer in the *mfr1Δ/mfr1Δ* mutant cells than in the wild type (Fig. 6B; data not shown). Thus, high levels of *cdc13* at the end of anaphase II maintain *cdc2*/cyclin kinase active, presumably by inhibiting sporulation in the *mfr1Δ/mfr1Δ* mutant.

### **cdc13 stabilization inhibits sporulation**

Finally, we tested whether expression of the non-degradable *cdc13-des2* destruction box mutant (Yamano et al., 1996) could inhibit sporulation. Fission yeast cells expressing stable *cdc13-*

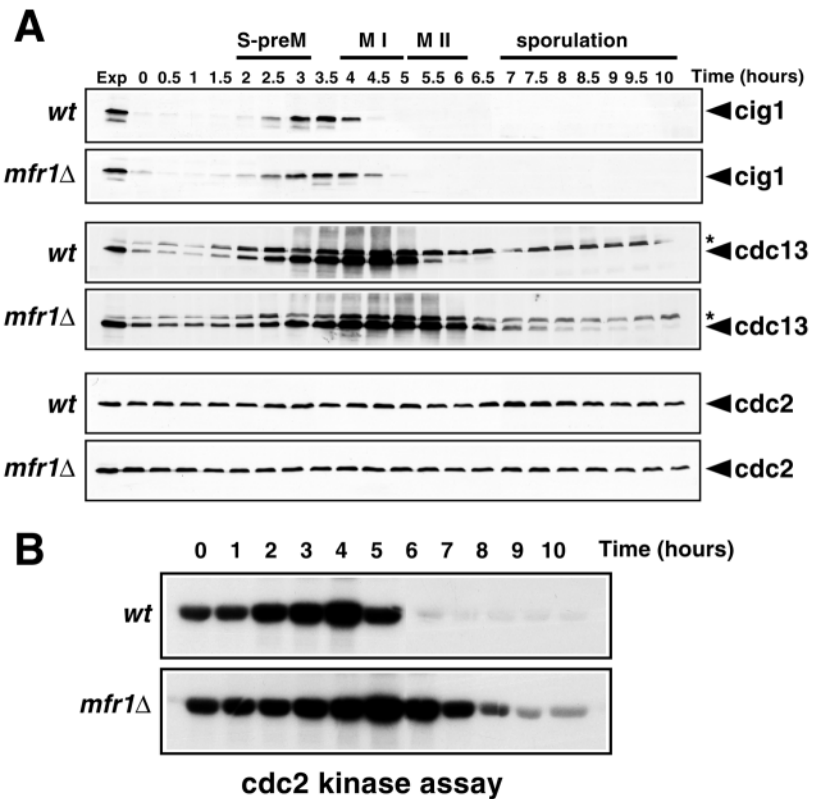

*des2*, in single copy under its own promoter, are viable (J. M. de Prada, M. A. Blanco and S. Moreno, manuscript in preparation). We integrated a genomic copy of *cdc13-des2* at the *leu1* locus in the *h<sup>-</sup>h<sup>-</sup> pat1-114/pat1-114* strain. Single-copy integrants were obtained and induced to undergo a synchronous meiosis (it should be noted that these cells are diploid and therefore contain two wild-type copies of *cdc13<sup>+</sup>* and one mutant copy of *cdc13-des2*). As a control, we used an *h<sup>-</sup>h<sup>-</sup> pat1-114/pat1-114* strain in which one additional copy of wild-type *cdc13<sup>+</sup>* had been integrated at the *leu1* locus. Cells expressing *cdc13-des2* were able to complete the meiotic nuclear divisions (data not shown) but were severely impaired for sporulation (Fig. 7A,B). After 9 hours at 34°C, only 13% of the cells expressing *cdc13-des2* were able to form four-spore asci, as compared to 43% for the control cells. Moreover, 34% of these cells did not contain a single spore versus 4% in the control (Fig. 7B). This confirms that stabilization of *cdc13* at the end of meiosis is inhibitory for sporulation and mimics the phenotype of the *mfr1Δ/mfr1Δ* mutant.

## **DISCUSSION**

Here we describe *mfr1*, a fission yeast protein closely related to *ste9/srw1*, which is a member of a highly conserved family of proteins containing seven WD repeats, similar to Hct1/Cdh1 of budding yeast and *Fizzy-related (Fzr)* of higher eukaryotes (Blanco et al., 2000; Kitamura et al., 1998; Kramer et al., 2000; Kramer et al., 1998; Schwab et al., 1997; Sigrist and Lehner, 1997; Visintin et al., 1997; Yamaguchi et al., 1997; Yamaguchi et al., 2000). These proteins function as activators of APC to promote poly-ubiquitination and degradation of mitotic cyclins

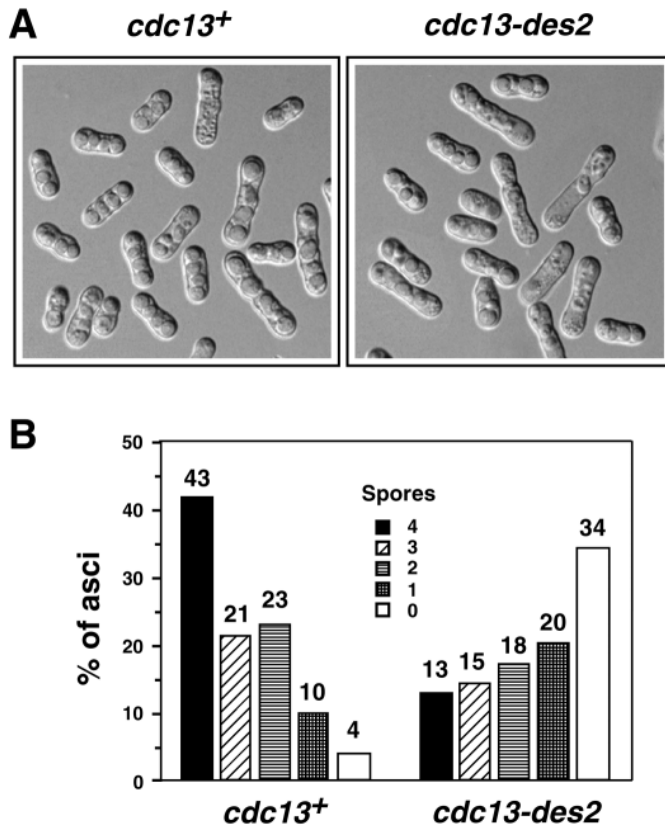

**Fig. 7.** Expression of non-degradable *cdc13-des2* destruction box mutant inhibits sporulation. The diploid strain *h<sup>-</sup>/h<sup>-</sup> pat1-114/pat1-114* (Sp964) was transformed with pJK148-*cdc13<sup>+</sup>* or pJK148-*cdc13-des2* to generate the strains Sp969 and Sp970, respectively. Single-copy integrants at the *leu1* locus were isolated and induced to undergo a synchronous meiosis. (A) Photographs of cells after 9 hours at 34°C. (B) Percentage of asci with 4, 3, 2, 1 and 0 spores.

at the end of mitosis and in G<sub>1</sub>. We present several lines of evidence indicating that *mfr1* is a meiosis-specific activator of APC involved in the degradation of the *cdc13* cyclin at the end of meiosis II. (1) The *mfr1<sup>+</sup>* gene is expressed exclusively during meiotic nuclear divisions; (2) *mfr1* colocalizes and interacts with APC; (3) *mfr1* is necessary for the rapid and timely degradation of the M-phase cyclin *cdc13* but not for *cig1*; (4) the *mfr1Δ* mutant completes meiosis II but fails to undergo sporulation; (5) stabilization of the M-phase cyclin *cdc13* prevents the formation of spores at the end of meiosis II.

#### APC<sup>mfr1</sup> functions specifically at the end of meiosis

*ste9* and *mfr1* are closely related APC activators. *ste9* functions in G<sub>1</sub> to promote the degradation of the mitotic cyclins *cdc13* and *cig1* (Blanco et al., 2000; Yamaguchi et al., 2000). *ste9Δ* mutants are unable to arrest the cell cycle in G<sub>1</sub> and are therefore sterile. We observed that the *mfr1Δ* mutant has no defect in the mitotic cell cycle. Haploid cells lacking *mfr1* arrest normally in G<sub>1</sub> upon nitrogen starvation and mate like the wild type. On the other hand, we found that *ste9* is not required for sporulation since a diploid *h<sup>-</sup>/h<sup>-</sup> pat1-114/pat1-114 ste9Δ/ste9Δ* mutant underwent meiosis and sporulation at 34°C with similar kinetics to a control *h<sup>-</sup>/h<sup>-</sup> pat1-114/pat1-114*

*ste9<sup>+</sup>/ste9<sup>+</sup>* (data not shown). Thus, APC<sup>ste9</sup> and APC<sup>mfr1</sup> must act at different stages of the fission yeast life cycle: APC<sup>ste9</sup> in the G<sub>1</sub> phase of the mitotic cell cycle and APC<sup>mfr1</sup> in the 'G<sub>1</sub> phase' that follows the end of meiosis. They are both necessary to inactivate *cdc2*/cyclin complexes in order to permit the onset of differentiation programs: mating in the case of APC<sup>ste9</sup>, and sporulation in the case of APC<sup>mfr1</sup>.

In the fission yeast mitotic cell cycle, at the end of anaphase, the actomyosin ring constricts and the division septum is synthesized. There is evidence that *cdc13* proteolysis and inactivation of *cdc2* kinase are necessary for actomyosin ring constriction (He et al., 1997). Here we show that in the *mfr1Δ/mfr1Δ* mutant the *cdc13* cyclin is stabilized and *cdc2* kinase activity remains high. Expression of a stable allele of *cdc13* inhibits sporulation, suggesting that inactivation of *cdc2/cdc13* marks the successful completion of chromosome segregation in both mitosis and meiosis and permits the formation of a septum or a spore wall, respectively. Currently we are unable to rule out the possibility that other as yet unidentified targets of *mfr1* might need to be degraded for sporulation.

#### Mfr1 orthologues in other organisms

In budding yeast, a protein named Spo70 related to Cdc20 and Hct1, which is expressed only in meiosis, has been described in the genomic analysis of genes expressed during meiosis (Chu et al., 1998). While our manuscript was in a late stage of preparation, a regulator of APC in *S. cerevisiae*, Ama1, that is identical to Spo70 was reported (Cooper et al., 2000). Like *mfr1*, Ama1 is a meiosis-specific activator of APC that triggers the degradation of Clb1 cyclin. There are, however, some differences between Ama1 and *mfr1*. Ama1 is more similar to the Fizzy family of APC activators while *mfr1* is closer to the Fizzy-related family (Fig. 1A). This is consistent with the fact that Ama1 is required earlier in meiosis than *mfr1*. *ama1* mutant cells arrest with a single nucleus, suggesting a role for Ama1 in meiosis I, while *mfr1* is needed once cells complete the two meiotic nuclear divisions. It is therefore possible that there could be several APC complexes acting in meiosis: APC<sup>Ama1</sup> with a role in meiosis I and APC<sup>mfr1</sup> acting at the end of meiosis.

We would like to thank Iain Hagan for anti-sad1 antibodies, Kathy Gould for the lid1-9xmyc strain, Pedro San Segundo, Rafael R. Daga and Avelino Bueno for valuable comments on the manuscript, and Chikashi Shimoda for sharing unpublished results. This work was supported by funding from the Comision Interministerial de Ciencia y Tecnologia (CICYT) and the European Union.

#### REFERENCES

- Bahler, J., Schuchert, P., Grimm, C. and Kohli, J. (1991). Synchronized meiosis and recombination in fission yeast: observations with *pat1-114* diploid cells. *Curr. Genet.* **19**, 445-451.
- Bahler, J., Wu, J. Q., Longtine, M. S., Shah, N. G., McKenzie, A., 3rd, Steever, A. B., Wach, A., Philippsen, P. and Pringle, J. R. (1998). Heterologous modules for efficient and versatile PCR-based gene targeting in *Schizosaccharomyces pombe*. *Yeast* **14**, 943-951.
- Balasubramanian, M. K., McCollum, D. and Surana, U. (2000). Tying the knot: linking cytokinesis to the nuclear cycle. *J. Cell Sci.* **113**, 1503-1513.
- Benito, J., Martín-Castellanos, C. and Moreno, S. (1998). Regulation of the G<sub>1</sub> phase of the cell cycle by periodic stabilization and degradation of the p25<sup>rum1</sup> CDK inhibitor. *EMBO J.* **17**, 482-497.



- Berry, L. D., Feoktistova, A., Wright, M. D. and Gould, K. L. (1999). The *Schizosaccharomyces pombe dim1+* gene interacts with the anaphase-promoting complex or cyclosome (APC/C) component *lid1+* and is required for APC/C function. *Mol. Cell. Biol.* **19**, 2535-2546.
- Blanco, M. A., Sanchez-Diaz, A., de Prada, J. M. and Moreno, S. (2000). APC<sup>ste9/srw1</sup> promotes degradation of mitotic cyclins in G1 and is inhibited by cdc2 phosphorylation. *EMBO J.* **19**, 3945-3955.
- Cebolla, A., Vinardell, J. M., Kiss, E., Olah, B., Roudier, F., Kondorosi, A. and Kondorosi, E. (1999). The mitotic inhibitor ccs52 is required for endoreduplication and ploidy-dependent cell enlargement in plants. *EMBO J.* **18**, 4476-4484.
- Cerutti, L. and Simanis, V. (1999). Asymmetry of the spindle pole bodies and spg1p GAP segregation during mitosis in fission yeast. *J. Cell Sci.* **112**, 2313-2321.
- Cerutti, L. and Simanis, V. (2000). Controlling the end of the cell cycle. *Curr. Opin. Genet. Dev.* **10**, 65-69.
- Chu, S., DeRisi, J., Eisen, M., Mulholland, J., Botstein, D., Brown, P. O. and Herskowitz, I. (1998). The transcriptional program of sporulation in budding yeast. *Science* **282**, 699-705.
- Cooper, K. F., Mallory, M. J., Egeland, D. B., Jarnik, M. and Strich, R. (2000). Ama1p is a meiosis-specific regulator of the anaphase promoting complex/cyclosome in yeast. *Proc. Natl. Acad. Sci. USA* **97**, 14548-14553.
- Hagan, I. and Yanagida, M. (1995). The product of the spindle formation gene *sad1+* associates with the fission yeast spindle pole body and is essential for viability. *J. Cell Biol.* **129**, 1033-1047.
- He, X., Patterson, T. E. and Sazer, S. (1997). The *Schizosaccharomyces pombe* spindle checkpoint protein mad2p blocks anaphase and genetically interacts with the anaphase-promoting complex. *Proc. Natl. Acad. Sci. USA* **94**, 7965-7970.
- Hirata, A. and Shimoda, C. (1994). Structural modification of spindle pole bodies during meiosis II is essential for the normal formation of ascospores in *Schizosaccharomyces pombe*: ultrastructural analysis of *spo* mutants. *Yeast* **10**, 173-183.
- Ikemoto, S., Nakamura, T., Kubo, M. and Shimoda, C. (2000). *S. pombe* sporulation-specific coiled-coil protein Spo15p is localized to the spindle pole body and essential for its modification. *J. Cell Sci.* **113**, 545-554.
- Jaspersen, S. L., Charles, J. F. and Morgan, D. O. (1999). Inhibitory phosphorylation of the APC regulator Hct1 is controlled by the kinase Cdc28 and the phosphatase Cdc14. *Curr. Biol.* **9**, 227-236.
- Kim, S. H., Lin, D. P., Matsumoto, S., Kitazono, A. and Matsumoto, T. (1998). Fission yeast slp1: an effector of the mad2-dependent spindle checkpoint. *Science* **279**, 1045-1047.
- Kitamura, K., Maekawa, H. and Shimoda, C. (1998). Fission yeast ste9, a homolog of Hct1/Cdh1 and Fizzy-related, is a novel negative regulator of cell cycle progression during G<sub>1</sub>-phase. *Mol. Biol. Cell.* **9**, 1065-1080.
- Kramer, E. R., Scheuringer, N., Podtelejnikov, A. V., Mann, M. and Peters, J. M. (2000). Mitotic regulation of the APC activator proteins CDC20 and CDH1. *Mol. Biol. Cell.* **11**, 1555-1569.
- Kramer, K. M., Fesquet, D., Johnson, A. L. and Johnston, L. H. (1998). Budding yeast RSII/APC2, a novel gene necessary for initiation of anaphase, encodes an APC subunit. *EMBO J.* **17**, 498-506.
- Le Goff, X., Woollard, A. and Simanis, V. (1999). Analysis of the *cps1* gene provides evidence for a septation checkpoint in *Schizosaccharomyces pombe*. *Mol. Gen. Genet.* **262**, 163-172.
- Moreno, S., Hayles, J. and Nurse, P. (1989). Regulation of p34<sup>cdc2</sup> protein kinase during mitosis. *Cell* **58**, 361-372.
- Moreno, S., Klar, A. and Nurse, P. (1991). Molecular genetic analysis of fission yeast *Schizosaccharomyces pombe*. *Methods Enzymol.* **194**, 795-823.
- Norbury, C. and Moreno, S. (1997). Cloning cell cycle regulatory genes by transcomplementation in yeast. *Methods Enzymol.* **283**, 44-59.
- Roeder, G. S. (1997). Meiotic chromosomes: it takes two to tango. *Genes Dev.* **11**, 2600-2621.
- Sazer, S. and Sherwood, S. W. (1990). Mitochondrial growth and DNA synthesis occur in the absence of nuclear DNA replication in fission yeast. *J. Cell Sci.* **97**, 509-516.
- Schwab, M., Lutum, A. S. and Seufert, W. (1997). Yeast Hct1 is a regulator of Clb2 cyclin proteolysis. *Cell* **90**, 683-693.
- Sigrist, S. J. and Lehner, C. F. (1997). *Drosophila* fizzy-related down-regulates mitotic cyclins and is required for cell proliferation arrest and entry into endocycles. *Cell* **90**, 671-681.
- Sipiczki, M. and Ferenczy, L. (1977). Protoplast fusion of *Schizosaccharomyces pombe* auxotrophic mutants of identical mating-type. *Mol. Gen. Genet.* **151**, 77-81.
- Sohrmann, M., Fankhauser, C., Brodbeck, C. and Simanis, V. (1996). The *dmf1/mid1* gene is essential for correct positioning of the division septum in fission yeast. *Genes Dev.* **10**, 2707-2719.
- Stern, B. and Nurse, P. (1998). Cyclin B proteolysis and the cyclin-dependent kinase inhibitor rum1p are required for pheromone-induced G1 arrest in fission yeast. *Mol. Biol. Cell.* **9**, 1309-1321.
- Tanaka, K. and Hirata, A. (1982). Ascospore development in the fission yeasts *Schizosaccharomyces pombe* and *S. japonicus*. *J. Cell Sci.* **56**, 263-279.
- Visintin, R., Prinz, S. and Amon, A. (1997). CDC20 and CDH1: a family of substrate-specific activators of APC-dependent proteolysis. *Science* **278**, 460-4633.
- Yamaguchi, S., Murakami, H. and Okayama, H. (1997). A WD repeat protein controls the cell cycle and differentiation by negatively regulating Cdc2/B-type cyclin complexes. *Mol. Biol. Cell.* **8**, 2475-2486.
- Yamaguchi, S., Okayama, H. and Nurse, P. (2000). Fission yeast Fizzy-related protein srw1p is a G1-specific promoter of mitotic cyclin B degradation. *EMBO J.* **19**, 3968-3977.
- Yamano, H., Gannon, J. and Hunt, T. (1996). The role of proteolysis in cell cycle progression in *Schizosaccharomyces pombe*. *EMBO J.* **15**, 5268-5279.
- Zachariae, W. and Nasmyth, K. (1999). Whose end is destruction: cell division and the anaphase-promoting complex. *Genes Dev.* **13**, 2039-2058.
- Zachariae, W., Schwab, M., Nasmyth, K. and Seufert, W. (1998). Control of cyclin ubiquitination by CDK-regulated binding of Hct1 to the anaphase promoting complex. *Science* **282**, 1721-1724.
